# Supplementary material
Source: PubMed Central journal article supplement (PMC4925202)
Supplement: NIHMS794729-supplement-Supplemental_Table_1.pdf [file NIHMS794729-supplement-Supplemental_Table_1.pdf]

**Supplemental Table 1.** Internal consistency (Cronbach’s  $\alpha$ ) for measures within and across the studies

| Measure       | Study 1 |    |     | Study 2 |     |     | Study 3 |     |     | Total sample |     |     |
|---------------|---------|----|-----|---------|-----|-----|---------|-----|-----|--------------|-----|-----|
|               | T1      | T2 | T3  | T1      | T2  | T3  | T1      | T2  | T3  | T1           | T2  | T3  |
| <b>PTSS</b>   |         |    |     |         |     |     |         |     |     |              |     |     |
| CASQ          | .91     | -- | --  | --      | --  | --  | --      | --  | --  | .91          | --  | --  |
| CATS          | .85     | -- | .87 | --      | --  | --  | --      | --  | --  | .85          | --  | .87 |
| CAPS-CA       | --      | -- | .82 | --      | --  | --  | --      | --  | --  | --           | --  | .82 |
| CPSS          | --      | -- | --  | .86     | .84 | .91 | --      | --  | .87 | .86          | .84 | .90 |
| ASC-Kids      | --      | -- | --  | --      | --  | --  | --      | .89 | --  | --           | .89 | --  |
| <b>Coping</b> |         |    |     |         |     |     |         |     |     |              |     |     |
| Kidcope       | --      | -- | --  | n/a     | .70 | .47 | n/a     | .55 | .71 | n/a          | .65 | .71 |

*Notes.* Appraisals’ reliability was not reported as it was a 2-item assessment. PTSS = posttraumatic stress symptoms. STEPP = Screening Tool for Early Predictors of PTSD. CASQ = Child Acute Stress Questionnaire. CATS = Child and Adolescent Trauma Survey Symptom Scale. CPSS = Child PTSD Symptom Scale. CAPS-CA = Clinician-Administered PTSD Scale for Children and Adolescents. ASC-Kids = Acute Stress Checklist for Children. T1 < weeks since injury, T2 = 6-12 weeks since injury, T3 = 6 months since injury.
