# Supplementary material
Source: PubMed Central journal article supplement (PMC4925202)
Supplement: NIHMS794729-supplement-Supplemental_Table_2R.pdf [file NIHMS794729-supplement-Supplemental_Table_2R.pdf]

**Supplemental Table 2.** Descriptive statistics for trauma history, appraisals, and PTSS

|                                | <b>Study 1</b>     | <b>Study 2</b>     | <b>Study 3</b>     | <b>Total sample</b> |
|--------------------------------|--------------------|--------------------|--------------------|---------------------|
| <b>TIME 1</b> (within 4 weeks) | <i>M (SD) days</i> | <i>M (SD) days</i> | <i>M (SD) days</i> | <i>M (SD)days</i>   |
|                                | 17.5 (8.4)         | 2.5 (2.6)          | 1.2 (1.5)          | 7.4 (9.4)           |
|                                | N (%)              | N (%)              | N (%)              | N (%)               |
| Presence of trauma history     | 222 (80.4)         | 170 (58.2)         | 88 (73.3)          | 480 (69.8)          |
| Appraisals                     |                    |                    |                    |                     |
| Felt really afraid             | 111 (40.2)         | 186 (63.7)         | 94 (78.3)          | 391 (56.8)          |
| Thought might die              | 57 (20.7)          | 41 (14.0)          | 26 (21.7)          | 124 (18.0)          |
| Presence of significant PTSS   | 64 (23.2)          | 68 (23.3)          | -                  | 132 (19.2)          |
| <b>TIME 2</b> (within 6 weeks) | <i>M (SD) days</i> | <i>M (SD) days</i> | <i>M (SD) days</i> | <i>M (SD) days</i>  |
|                                | -                  | 55.6 (20.5)        | 27.9 (10.9)        | 45.8 (22.1)         |
|                                | N (%)              | N (%)              | N (%)              | N (%)               |
| Presence of significant PTSS   | -                  | 38 (13.0)          | 11 (9.2)           | 49 (7.1)            |
| Coping                         | <i>M (SD)</i>      | <i>M (SD)</i>      | <i>M (SD)</i>      | <i>M (SD)</i>       |
| Escape Coping*                 | -                  | 4.48 (2.00)        | 4.37 (1.68)        | 4.44 (1.89)         |
| Control Coping**               | -                  | 3.45 (1.34)        | 3.50 (1.20)        | 3.47 (1.29)         |
| <b>TIME 3</b> (3-6 months)     | <i>M (SD) days</i> | <i>M (SD) days</i> | <i>M (SD) days</i> | <i>M (SD)days</i>   |
|                                | 209.4 (78.1)       | 201.5 (19.5)       | 112.9 (20.4)       | 199.1 (64.3)        |
|                                | N (%)              | N (%)              | N (%)              | N (%)               |
| Presence of significant PTSS   | 39 (14.1)          | 29 (9.9)           | 17 (14.2)          | 85 (12.4)           |

Notes. Escape coping has a range of 0-10. Control coping has a range of 0-5.
