# Supplementary material
Source: PubMed Central journal article supplement (PMC4925202)
Supplement: NIHMS794729-supplement-Supplemental_Table_3.pdf [file NIHMS794729-supplement-Supplemental_Table_3.pdf]

**Supplemental Table 3.** Bivariate Correlations among the Study Variables

| Variable                  | 1      | 2    | 3    | 4      | 5      | 6      | 7      | 8      | 9      | 10     | 11     | 12     | 13     |
|---------------------------|--------|------|------|--------|--------|--------|--------|--------|--------|--------|--------|--------|--------|
| 1. Age                    | -      |      |      |        |        |        |        |        |        |        |        |        |        |
| 2. Sex                    | -.05   | -    |      |        |        |        |        |        |        |        |        |        |        |
| 3. Trauma Hx              | .00    | .00  | -    |        |        |        |        |        |        |        |        |        |        |
| 4. Perceived Fear         | -.14*  | .15* | .04  | -      |        |        |        |        |        |        |        |        |        |
| 5. Subjective Life Threat | -.14*  | .04  | .06  | .50*** | -      |        |        |        |        |        |        |        |        |
| 6. Cope1                  | -.07   | .03  | -.07 | .19*   | .26*   | -      |        |        |        |        |        |        |        |
| 7. Cope2                  | -.08   | -.01 | .05  | .08    | .10    | .39*** | -      |        |        |        |        |        |        |
| 8. Cope3                  | -.02   | .06  | -.03 | .04    | .16    | .38*** | .46*** | -      |        |        |        |        |        |
| 9. Cope4                  | -.18** | .07  | .00  | .19**  | .32*** | .12    | .13    | .16*   | -      |        |        |        |        |
| 10. Cope5                 | -.17** | -.05 | .00  | .27**  | .26**  | .33*** | .28*** | .34*** | .29    | -      |        |        |        |
| 11. Cope6                 | .03    | -.01 | .02  | -.09   | .01    | .16*   | .23*** | .29*** | .35*** | .26    | -      |        |        |
| 12. PTSS T1               | -.16*  | -.08 | .12  | .42*** | .38*** | .06    | .29*   | .35*   | .19*   | .39*** | .19    | -      |        |
| 13. PTSS T2               | -.21** | -.11 | -.08 | .12    | .30*   | .14    | .18    | .35**  | .44*** | .39*** | .41*** | .53*** | -      |
| 14. PTSS T3               | -.01   | .11  | .09  | .25*   | .31**  | .08    | .10    | .34*   | .31**  | .28**  | .27**  | .60*** | .51*** |

Notes. \*  $p < .05$ , \*\* $p < .01$ , \*\*\* $p < .001$
