# Supplementary material
Source: PubMed Central journal article supplement (PMC4925202)
Supplement: NIHMS794729-supplement-Supplemental_Table_4.pdf [file NIHMS794729-supplement-Supplemental_Table_4.pdf]

**Supplemental Table 4.** Model factor loadings with 95% confidence intervals

|                                      | <b>Estimate</b> | <b>Lower<br/>95%<br/>CI</b> | <b>Upper<br/>95%<br/>CI</b> | <b>Sig.</b> |
|--------------------------------------|-----------------|-----------------------------|-----------------------------|-------------|
| <b>Factor Loadings</b>               |                 |                             |                             |             |
| Control Coping --> Cope1             | 0.58            | 0.44                        | 0.72                        | <.001       |
| Control Coping --> Cope2             | 0.61            | 0.48                        | 0.74                        | <.001       |
| Control Coping --> Cope3             | 0.73            | 0.56                        | 0.91                        | <.001       |
| Escape Coping --> Cope4              | 0.53            | 0.4                         | 0.66                        | <.001       |
| Escape Coping --> Cope5              | 0.66            | 0.53                        | 0.79                        | <.001       |
| Escape Coping --> Cope6              | 0.42            | 0.28                        | 0.57                        | <.001       |
| Appraisals --> Fear during injury    | 0.58            | 0.44                        | 0.72                        | <.001       |
| Appraisals --> Perceived life threat | 0.66            | 0.52                        | 0.79                        | <.001       |
| <b>Structural Paths</b>              |                 |                             |                             |             |
| Appraisals --> Control Coping        | 0.45            | 0.21                        | 0.69                        | <.001       |
| Appraisals --> Escape Coping         | 0.75            | 0.53                        | 0.97                        | <.001       |
| Appraisals --> PTSS T1               | 0.58            | 0.45                        | 0.71                        | <.001       |
| Control Coping --> PTSS T3           | -0.12           | -0.59                       | 0.35                        | 0.61        |
| Escape Coping --> PTSS T3            | 0.51            | 0.15                        | 0.88                        | <.01        |
| PTSS T1 --> PTSS T2                  | 0.61            | 0.46                        | 0.77                        | <.001       |
| PTSS T2 --> PTSS T3                  | 0.42            | 0.22                        | 0.61                        | <.001       |
| Age --> PTSS T3                      | 0.13            | -0.03                       | 0.29                        | 0.11        |
| Sex --> PTSS T3                      | 0.12            | -0.02                       | 0.25                        | 0.09        |

APPRAISALS, COPING, POSTTRAUMATIC STRESS 33

|                                    |       |       |       |       |
|------------------------------------|-------|-------|-------|-------|
| Trauma History --> PTSS T3         | 0.06  | -0.1  | 0.22  | 0.45  |
| Study 2 --> PTSS T3                | -0.02 | -0.19 | 0.15  | 0.82  |
| Study 3 --> PTSS T3                | -0.01 | -0.15 | 0.13  | 0.92  |
| <b>Covariance</b>                  |       |       |       |       |
| Control Coping <--> Escape Coping  | 0.53  | 0.18  | 0.87  | <.001 |
| Control Coping <--> Age            | 0     | -0.18 | 0.18  | 0.98  |
| Control Coping <--> Sex            | 0.02  | -0.16 | 0.2   | 0.83  |
| Control Coping <--> Trauma History | -0.08 | -0.26 | 0.11  | 0.41  |
| Control Coping <--> Study 2        | 0.05  | -0.11 | 0.21  | 0.55  |
| Control Coping <--> Study 3        | -0.02 | -0.16 | 0.12  | 0.79  |
| Escape Coping <--> Age             | -0.08 | -0.3  | 0.15  | 0.52  |
| Escape Coping <--> Sex             | -0.06 | -0.3  | 0.18  | 0.62  |
| Escape Coping <--> Trauma History  | -0.09 | -0.34 | 0.17  | 0.52  |
| Escape Coping <--> Study 2         | 0.15  | -0.08 | 0.39  | 0.2   |
| Escape Coping <--> Study 3         | -0.11 | -0.32 | 0.1   | 0.29  |
| Study 2 <--> Appraisals            | -0.15 | -0.26 | -0.05 | <.01  |
| Study 3 <--> Appraisals            | 0.07  | -0.04 | 0.18  | 0.23  |
| Age <--> Appraisals                | -0.23 | -0.35 | -0.12 | <.001 |
| Sex <--> Appraisals                | 0.04  | -0.07 | 0.16  | 0.45  |
| Trauma History <--> Appraisals     | 0.09  | -0.03 | 0.21  | 0.15  |
| Sex <--> AGE                       | -0.05 | -0.13 | 0.02  | 0.14  |
| Sex <--> Trauma History            | 0     | -0.08 | 0.08  | 0.98  |
| Trauma History <--> Age            | 0     | -0.08 | 0.08  | 0.99  |

APPRAISALS, COPING, POSTTRAUMATIC STRESS 34

|                             |       |       |       |       |
|-----------------------------|-------|-------|-------|-------|
| Study 2 <--> Study 3        | -0.4  | -0.45 | -0.34 | <.001 |
| Study 2 <--> Age            | 0.12  | 0.04  | 0.19  | <.01  |
| Study 2 <--> Trauma History | -0.22 | -0.28 | -0.15 | <.001 |
| Study 2 <--> Sex            | 0.01  | -0.06 | 0.09  | 0.76  |
| Study 3 <--> Age            | 0.03  | -0.04 | 0.1   | 0.39  |
| Study 3 <--> Trauma History | -0.03 | -0.1  | 0.05  | 0.48  |
| Study 3 <--> Sex            | 0.04  | -0.03 | 0.12  | 0.24  |

---
